# Supplementary material for: Coexpression Network Analysis Identifies Transcriptional Modules Related to Proastrocytic Differentiation and Sprouty Signaling in Glioma
Source: Oxford University Press journal article supplement (doi:10.1158/0008-5472.can-10-2465), 2010-12-14
Supplement: 00085472can102465-sup-stab_1.xls [file 00085472can102465-sup-stab_1.xls]

## Sheet: Gravendeel dataset
Sample	Survival (years)	Censor	Diagnosis	Grade	Age at diagnosis	EGFR
X008	9.82	Dead	Oligodendroglioma	3	44.57	NA
X009	11.67	Dead	Oligodendroglioma	3	28.69	wild type
X011	8.92	Dead	Oligodendroglioma	3	38.58	wild type
X013	8.59	Dead	Oligodendroglioma	3	33.89	wild type
X020	3.24	Dead	Oligodendroglioma	3	48.03	wild type
X021	6.81	Dead	Oligodendroglioma	3	31.53	wild type
X023	8.12	Dead	Oligodendroglioma	3	44.41	wild type
X025	3.04	Dead	Oligodendroglioma	3	51.4	wild type
X040	10.28	Dead	Oligodendroglioma	3	38.53	wild type
X053	1.83	Dead	Oligodendroglioma	3	34.93	NA
X055	17.49	Dead	Oligodendroglioma	3	23.33	wild type
X056	1.34	Dead	Glioblastoma	4	44.09	NA
X060	1.5	Dead	Glioblastoma	4	37.84	wild type
X062	2.3	Dead	Glioblastoma	4	51.44	NA
X063	3.28	Dead	Glioblastoma	4	52.06	wild type
X064	6.77	Alive	Glioblastoma	4	33.2	wild type
X066	0.64	Dead	Glioblastoma	4	32.36	amplification
X067	0.58	Dead	Glioblastoma	4	57.25	amplification
X072	1.27	Dead	Glioblastoma	4	54.12	wild type
X073	0.69	Dead	Glioblastoma	4	55.52	wild type
X077	1.3	Dead	Glioblastoma	4	54.06	NA
X080	1.92	Dead	Glioblastoma	4	53.26	amplification
X081	0.48	Dead	Glioblastoma	4	47.74	wild type
X082	3.47	Dead	Oligoastrocytoma	3	31.56	wild type
X083	0.28	Dead	Oligoastrocytoma	3	48.6	amplification
X084	4.77	Dead	Oligodendroglioma	3	48.1	NA
X087	0.71	Dead	Glioblastoma	4	45.71	wild type
X089	0.66	Dead	Glioblastoma	4	54.18	NA
X090	0.47	Dead	Glioblastoma	4	63.33	NA
X092	1.26	Dead	Glioblastoma	4	62.96	NA
X098	0.98	Dead	Glioblastoma	4	35.7	wild type
X099	0.86	Dead	Glioblastoma	4	51.64	wild type
X101	0.62	Dead	Glioblastoma	4	57.68	NA
X104	0.21	Dead	Glioblastoma	4	71.09	NA
X105	1.03	Dead	Glioblastoma	4	52.2	NA
X107	0.41	Dead	Glioblastoma	4	51.17	NA
X111	0.94	Dead	Glioblastoma	4	37.25	NA
X112	0.59	Dead	Glioblastoma	4	73.65	NA
X113	6.62	Alive	Glioblastoma	4	33.09	NA
X117	0.16	Dead	Glioblastoma	4	55.98	NA
X119	0.18	Dead	Glioblastoma	4	30.33	NA
X120	0.88	Dead	Glioblastoma	4	61.33	NA
X123	2.05	Dead	Glioblastoma	4	29.55	NA
X126	1.4	Dead	Glioblastoma	4	37.98	NA
X130	6.31	Dead	Glioblastoma	4	32.59	NA
X131	1.59	Dead	Glioblastoma	4	39.36	NA
X132	0.84	Dead	Glioblastoma	4	55.2	NA
X133	0.04	Dead	Glioblastoma	4	23.02	wild type
X134	1.48	Dead	Astrocytoma	2	30.69	NA
X136	3.21	Dead	Glioblastoma	4	26.17	NA
X138	0.37	Dead	Glioblastoma	4	68.04	NA
X139	12.56	Alive	Glioblastoma	4	34.84	NA
X141	0.59	Dead	Glioblastoma	4	40.58	NA
X142	1.08	Dead	Glioblastoma	4	47.93	amplification
X143	4.79	Dead	Astrocytoma	2	38.05	wild type
X144	10.86	Alive	Oligodendroglioma	3	46.04	wild type
X147	1.85	Dead	Astrocytoma	2	59.35	NA
X148	0.41	Dead	Astrocytoma	3	64.01	NA
X149	0.82	Dead	Glioblastoma	4	57.58	NA
X150	0.98	Dead	Oligodendroglioma	3	60.46	NA
X152	2.89	Dead	Glioblastoma	4	43.26	amplification
X155	1.55	Dead	Glioblastoma	4	61.74	wild type
X157	0.32	Dead	Glioblastoma	4	36.5	NA
X158	1.81	Dead	Astrocytoma	3	32.14	wild type
X161	0.25	Dead	Glioblastoma	4	51.62	amplification
X162	0.65	Dead	Glioblastoma	4	53.3	NA
X163	0.64	Dead	Glioblastoma	4	48.04	amplification
X164	0.03	Dead	Glioblastoma	4	54.59	amplification
X168	0.58	Dead	Glioblastoma	4	73.11	NA
X169	0.3	Dead	Glioblastoma	4	69.89	NA
X170	1	Lost_to_follow-up	Oligodendroglioma	3	43.64	wild type
X171	0.54	Dead	Oligoastrocytoma	3	56.42	NA
X172	1.29	Dead	Glioblastoma	4	63.08	amplification
X173	3.46	Dead	Glioblastoma	4	60.39	NA
X174	0.28	Dead	Glioblastoma	4	51.85	wild type
X176	2.76	Dead	Astrocytoma	3	43.89	wild type
X178	0.73	Dead	Glioblastoma	4	58.23	amplification
X179	0.71	Dead	Oligoastrocytoma	3	46.15	wild type
X180	2.46	Dead	Glioblastoma	4	30.43	NA
X182	3.32	Dead	Astrocytoma	3	37.12	NA
X183	0.12	Dead	Glioblastoma	4	51.92	NA
X185	4.07	Dead	Oligoastrocytoma	3	38.07	wild type
X186	1.6	Dead	Oligoastrocytoma	3	57.7	amplification
X187	1.27	Dead	Oligoastrocytoma	3	36.61	amplification
X188	3.16	Dead	Oligoastrocytoma	3	62.2	NA
X189	6.87	Dead	Oligodendroglioma	3	43.57	wild type
X190	1.53	Dead	Oligoastrocytoma	3	41.93	wild type
X194	0.19	Dead	Astrocytoma	3	37.44	amplification
X196	1.16	Dead	Glioblastoma	4	45.5	NA
X198	6.27	Dead	Astrocytoma	3	23.88	NA
X199	1.11	Dead	Glioblastoma	4	65.52	amplification
X201	0.88	Dead	Glioblastoma	4	63.73	amplification
X203	0.8	Dead	Glioblastoma	4	56.41	amplification
X204	1.99	Dead	Astrocytoma	3	41.77	NA
X206	0.29	Dead	Glioblastoma	4	41.09	wild type
X207	0.72	Dead	Glioblastoma	4	67.13	wild type
X209	1.96	Dead	Oligoastrocytoma	3	42.56	NA
X210	1.75	Dead	Glioblastoma	4	54.94	NA
X214	2.84	Dead	Oligoastrocytoma	3	33.26	NA
X216	0.3	Dead	Glioblastoma	4	65.35	NA
X218	0.74	Dead	Glioblastoma	4	41.39	amplification
X219	0.55	Dead	Glioblastoma	4	56.64	NA
X222	0.56	Dead	Glioblastoma	4	66.39	NA
X223	1.06	Dead	Glioblastoma	4	52.69	wild type
X224	8.16	Alive	Pilocytic astrocytoma	1	15.67	NA
X225	0.33	Dead	Glioblastoma	4	72.22	NA
X227	3.1	Lost_to_follow-up	Glioblastoma	4	47.4	NA
X228	0.26	Dead	Glioblastoma	4	54.6	NA
X229	6.8	Alive	Oligoastrocytoma	3	35.92	wild type
X230	7.48	Alive	Astrocytoma	2	43	NA
X233	1.02	Dead	Glioblastoma	4	61.31	amplification
X237	3.31	Dead	Glioblastoma	4	32.5	wild type
X240	0.65	Dead	Glioblastoma	4	54.37	wild type
X242	0.35	Dead	Glioblastoma	4	64.61	wild type
X243	10.34	Dead	Oligoastrocytoma	3	40.06	wild type
X244	0.45	Dead	Glioblastoma	4	62.36	NA
X246	6.21	Alive	Oligodendroglioma	3	62.46	NA
X247	5.62	Dead	Oligodendroglioma	3	53.65	NA
X250	0.6	Dead	Glioblastoma	4	70.28	wild type
X251	3.97	Dead	Astrocytoma	3	33.83	wild type
X252	1.14	Dead	Glioblastoma	4	62.28	NA
X253	0.62	Dead	Glioblastoma	4	58.78	amplification
X254	0.67	Dead	Glioblastoma	4	14.38	amplification
X255	3.65	Dead	Oligoastrocytoma	3	42.98	wild type
X256	0.27	Dead	Glioblastoma	4	74.56	amplification
X257	3.3	Dead	Oligodendroglioma	3	66.86	wild type
X258	2.26	Dead	Glioblastoma	4	67.6	amplification
X259	5.02	Dead	Oligodendroglioma	3	60.33	NA
X260	0.71	Dead	Glioblastoma	4	33.12	wild type
X262	8.23	Alive	Oligodendroglioma	3	59.56	wild type
X270	9.11	Dead	Oligodendroglioma	3	57.64	wild type
X271	1.47	Dead	Oligodendroglioma	3	57.01	wild type
X275	7.44	Dead	Oligodendroglioma	3	65.59	wild type
X283	0.28	Dead	Glioblastoma	4	15.02	amplification
X284	7.96	Dead	Oligodendroglioma	2	50.23	wild type
X285	NA	Lost_to_follow-up	Glioblastoma	4	78.08	amplification
X286	5.56	Lost_to_follow-up	Glioblastoma	4	52.88	wild type
X291	0.63	Dead	Oligoastrocytoma	3	71.11	amplification
X293	2.99	Dead	Oligodendroglioma	3	46.51	wild type
X294	NA	Lost_to_follow-up	Glioblastoma	4	66.8	wild type
X295	1.19	Dead	Oligodendroglioma	2	34.71	wild type
X299	0.89	Dead	Glioblastoma	4	45.63	wild type
X300	6.5	Alive	Pilocytic astrocytoma	1	22.28	NA
X306	0.19	Dead	Oligoastrocytoma	3	43.11	amplification
X308	0.03	Alive	Pilocytic astrocytoma	1	11.72	NA
X310	2.41	Dead	Glioblastoma	4	24.42	wild type
X315	0.61	Dead	Glioblastoma	4	40.74	wild type
X319	1.22	Dead	Glioblastoma	4	42.7	wild type
X328	0.4	Dead	Glioblastoma	4	69.95	amplification
X332	0.7	Dead	Glioblastoma	4	55.39	amplification
X333	1.1	Dead	Astrocytoma	2	32.15	NA
X336	1.19	Dead	Astrocytoma	2	73.19	NA
X337	0.18	Dead	Glioblastoma	4	43.21	wild type
X351	1.64	Dead	Oligodendroglioma	3	79.19	wild type
X352	1.06	Dead	Glioblastoma	4	38.11	NA
X353	9.79	Dead	Glioblastoma	4	48.84	wild type
X360	9.85	Dead	Oligodendroglioma	3	37.61	wild type
X362	2.66	Dead	Glioblastoma	4	64.29	NA
X368	2.21	Dead	Oligodendroglioma	3	75.13	wild type
X372	2.62	Dead	Glioblastoma	4	46.83	wild type
X376	1.81	Dead	Glioblastoma	4	32.14	NA
X378	4.13	Dead	Glioblastoma	4	50.34	wild type
X380	1.61	Dead	Glioblastoma	4	46.52	wild type
X384	1.92	Dead	Glioblastoma	4	53.26	NA
X387	3.32	Dead	Glioblastoma	4	37.12	NA
X388	1.21	Dead	Glioblastoma	4	58.58	NA
X389	1.21	Dead	Glioblastoma	4	58.58	wild type
X393	0.06	Dead	Glioblastoma	4	67.03	NA
X395	1.85	Dead	Glioblastoma	4	52.98	amplification
X405	0.6	Dead	Oligodendroglioma	3	41.98	NA
X406	0	Dead	Oligodendroglioma	2	57.22	wild type
X411	0.05	Dead	Glioblastoma	4	60.28	wild type
X415	6.04	Dead	Oligodendroglioma	3	39.99	wild type
X416	15.82	Dead	Oligodendroglioma	3	38.37	NA
X417	4.86	Dead	Oligoastrocytoma	3	44.15	NA
X420	1.32	Dead	Astrocytoma	2	37.6	wild type
X421	0.02	Lost_to_follow-up	Glioblastoma	4	70.3	NA
X425	1.26	Lost_to_follow-up	Glioblastoma	4	34.78	NA
X427	3.76	Dead	Oligodendroglioma	2	53.85	wild type
X428	11.41	Dead	Oligoastrocytoma	3	37.11	wild type
X431	0.53	Dead	Oligoastrocytoma	3	78.52	amplification
X432	5.56	Lost_to_follow-up	Glioblastoma	4	52.88	NA
X433	0.02	Dead	Oligoastrocytoma	3	70.07	NA
X434	1.05	Dead	Glioblastoma	4	55.55	NA
X436	0.47	Dead	Glioblastoma	4	48.35	NA
X437	0.08	Dead	Glioblastoma	4	70.67	NA
X440	0.86	Lost_to_follow-up	Astrocytoma	2	31.77	NA
X441	3.76	Dead	Oligoastrocytoma	2	55.42	wild type
X442	0.02	Dead	Glioblastoma	4	77.31	NA
X443	0.35	Dead	Glioblastoma	4	60.36	amplification
X444	NA	Dead	Glioblastoma	4	56.85	NA
X445	1.18	Dead	Oligoastrocytoma	3	52.07	amplification
X446	0.45	Dead	Astrocytoma	3	49.64	wild type
X449	1.97	Dead	Astrocytoma	3	37.18	NA
X451	4.55	Alive	Astrocytoma	2	23.72	amplification
X452	0.04	Dead	Astrocytoma	3	38.42	NA
X455	0.04	Dead	Oligodendroglioma	3	54.35	wild type
X458	0.61	Dead	Glioblastoma	4	71.09	NA
X461	1.69	Dead	Oligodendroglioma	3	78.82	NA
X462	0.82	Dead	Astrocytoma	3	81.18	NA
X463	1.78	Dead	Oligodendroglioma	2	63.1	NA
X465	10.36	Dead	Oligodendroglioma	3	54	NA
X466	20.68	Dead	Oligodendroglioma	3	37.08	NA
X467	0.05	Dead	Astrocytoma	3	37.55	NA
X468	0.65	Dead	Glioblastoma	4	55.71	NA
X473	1.2	Dead	Astrocytoma	3	46.47	wild type
X483	5.33	Dead	Oligodendroglioma	3	35.23	NA
X485	0.5	Dead	Glioblastoma	4	67.48	NA
X487	0.34	Dead	Glioblastoma	4	64.26	NA
X488	0.02	Dead	Glioblastoma	4	77.31	NA
X489	5.17	Dead	Glioblastoma	4	46.61	wild type
X490	2.93	Dead	Glioblastoma	4	36.27	wild type
X494	3	Dead	Oligodendroglioma	3	49.94	wild type
X495	6.08	Alive	Astrocytoma	3	38.4	wild type
X496	0.91	Dead	Glioblastoma	4	70.67	NA
X497	6.12	Dead	Astrocytoma	3	35.67	NA
X499	3.2	Dead	Astrocytoma	2	33.25	wild type
X500	16.05	Dead	Oligodendroglioma	2	32.98	wild type
X509	0.05	Dead	Glioblastoma	4	67.1	wild type
X510	1.53	Dead	Glioblastoma	4	50.83	NA
X512	0.79	Dead	Glioblastoma	4	70.51	amplification
X514	18.72	Dead	Oligoastrocytoma	3	43.93	wild type
X515	0.35	Dead	Glioblastoma	4	61.1	wild type
X519	0.92	Dead	Glioblastoma	4	80.65	wild type
X520	0.55	Dead	Glioblastoma	4	60.78	wild type
X524	4.91	Alive	Astrocytoma	2	43.85	NA
X525	0.24	Dead	Glioblastoma	4	67.01	NA
X529	0.26	Dead	Oligoastrocytoma	3	54.98	wild type
X532	0.48	Dead	Glioblastoma	4	79.06	NA
X533	3.44	Alive	Oligodendroglioma	2	51.63	NA
X535	2.3	Dead	Glioblastoma	4	42.67	NA
X536	3.7	Alive	Oligoastrocytoma	2	32.92	wild type
X537	0.53	Dead	Glioblastoma	4	69.88	wild type
X538	3.27	Alive	Oligodendroglioma	2	44.74	wild type
X540	0.3	Dead	Glioblastoma	4	63.61	wild type
X543	0.98	Dead	Glioblastoma	4	56.62	amplification
X545	2.84	Alive	Astrocytoma	2	39.92	NA
X547	3.33	Alive	Oligodendroglioma	3	56.15	NA
X564	0.73	Dead	Glioblastoma	4	68.18	NA
X565	2.79	Dead	Glioblastoma	4	59.03	NA
X566	0.48	Dead	Glioblastoma	4	58.71	wild type
X567	2.02	Dead	Oligodendroglioma	3	45.39	wild type
X568	13.3	Alive	Oligoastrocytoma	3	36.66	NA
X569	3.69	Dead	Oligoastrocytoma	2	28.55	wild type
X584	0.35	Dead	Glioblastoma	4	71.02	wild type
X585	0.21	Dead	Glioblastoma	4	70.23	amplification
X601	3.32	Dead	Glioblastoma	4	22.52	NA
X603	0.23	Dead	Glioblastoma	4	55.49	NA
X609	NA	Lost_to_follow-up	Glioblastoma	4	52.5	NA
X610	0.3	Dead	Oligodendroglioma	3	70.98	wild type
X612	1.58	Dead	Glioblastoma	4	68.46	amplification
X615	1.14	Dead	Glioblastoma	4	64.28	NA
X619	0.48	Dead	Oligodendroglioma	3	52.52	amplification
X627	0.76	Dead	Glioblastoma	4	49.14	wild type
X628	7.52	Dead	Astrocytoma	2	49.83	NA
X629	2.22	Dead	Glioblastoma	4	65.53	wild type
X631	0.56	Dead	Glioblastoma	4	54.72	NA
X634	0.63	Dead	Glioblastoma	4	69.38	NA
X635	0.28	Dead	Glioblastoma	4	67.11	NA
X636	1.34	Dead	Oligodendroglioma	3	43.9	wild type
X638	7.04	Alive	Pilocytic astrocytoma	1	33.48	NA
X648	5.56	Alive	Oligodendroglioma	3	46.86	wild type
X649	1.92	Dead	Glioblastoma	4	31.72	NA
X651	0.15	Dead	Glioblastoma	4	78.12	NA
X652	0.34	Dead	Glioblastoma	4	62.11	NA
X656	1.12	Dead	Glioblastoma	4	47.29	amplification
X657	0.29	Dead	Glioblastoma	4	61.28	amplification
X662	1.05	Dead	Glioblastoma	4	33.74	wild type
X670	1.31	Dead	Oligoastrocytoma	3	64.97	amplification
X691	0.11	Dead	Glioblastoma	4	73.64	NA
X697	6.06	Dead	Oligodendroglioma	3	26.66	NA
X704	0.38	Dead	Glioblastoma	4	63.3	amplification
X709	6.31	Lost_to_follow-up	Pilocytic astrocytoma	1	17.55	NA
X710	10.37	Alive	Pilocytic astrocytoma	1	33.88	NA
X711	11.21	Alive	Pilocytic astrocytoma	1	37.02	NA
X712	0.19	Lost_to_follow-up	Pilocytic astrocytoma	1	32.35	NA

## Sheet: Li Train dataset
Sample	Survival (years)	Censor	Diagnosis	Grade	Age at diagnosis
HF0017	10.95	Alive	Astrocytoma	3	48
HF0022	11	Alive	Astrocytoma	2	24
HF0024	0.47	Dead	Glioblastoma	4	77
HF0026	4.69	Dead	Astrocytoma	2	63
HF0031	0.04	Dead	Glioblastoma	4	65
HF0050	2.16	Dead	Glioblastoma	4	52
HF0066	0.75	Dead	Glioblastoma	4	57
HF0087	6.48	Dead	Astrocytoma	3	61
HF0089	0.65	Dead	Astrocytoma	3	65
HF0108	10.85	Alive	Astrocytoma	3	35
HF0138	0.1	Dead	Glioblastoma	4	76
HF0142	0.02	Dead	Glioblastoma	4	71
HF0152	10.81	Alive	Astrocytoma	3	30
HF0180	0.03	Dead	Glioblastoma	4	74
HF0183	10.68	Unknown	Oligoastrocytoma	2	54
HF0184	0.98	Dead	Oligodendroglioma	3	53
HF0212	NA	Unknown	Glioblastoma	4	61
HF0218	NA	Unknown	Oligodendroglioma	2	72
HF0223	3.54	Dead	Astrocytoma	2	47
HF0244	0.62	Dead	Astrocytoma	3	64
HF0251	1.87	Dead	Oligodendroglioma	3	54
HF0252	10.12	Alive	Astrocytoma	2	37
HF0291	7.77	Dead	Oligodendroglioma	2	50
HF0300-3	4.76	Dead	Glioblastoma	4	31
HF0305	4.04	Dead	Astrocytoma	2	32
HF0316	6.03	Dead	Astrocytoma	2	44
HF0329	NA	Unknown	Astrocytoma	2	32
HF0332	NA	Unknown	Astrocytoma	2	33
HF0408	1.3	Dead	Glioblastoma	4	55
HF0434	0.5	Dead	Astrocytoma	2	64
HF0435	NA	Alive	Astrocytoma	3	NA
HF0442-5	1.61	Dead	Glioblastoma	4	45
HF0445	3.88	Dead	Glioblastoma	4	33
HF0450	2.42	Dead	Astrocytoma	2	33
HF0460	0.88	Dead	Oligodendroglioma	3	56
HF0488	NA	Unknown	Astrocytoma	2	35
HF0491	NA	Unknown	Astrocytoma	2	33
HF0510	1.61	Dead	Oligodendroglioma	2	72
HF0520	0.72	Dead	Glioblastoma	4	63
HF0543	NA	Alive	Glioblastoma	4	53
HF0583	1.3	Dead	Glioblastoma	4	60
HF0606	6.31	Dead	Astrocytoma	2	31
HF0608	0.87	Dead	Astrocytoma	2	53
HF0627	0.88	Dead	Glioblastoma	4	46
HF0639	NA	Unknown	Astrocytoma	2	44
HF0654	1.2	Dead	Glioblastoma	4	57
HF0670	7.92	Alive	Astrocytoma	2	53
HF0702	0.7	Dead	Astrocytoma	3	53
HF0726	7.35	Alive	Astrocytoma	2	35
HF0757	6.15	Dead	Astrocytoma	2	41
HF0778	0.66	Dead	Astrocytoma	2	69
HF0790	0.62	Dead	Glioblastoma	4	73
HF0802	7.24	Alive	Astrocytoma	2	32
HF0816	3.84	Dead	Oligodendroglioma	3	46
HF0822	NA	Unknown	Astrocytoma	2	39
HF0828	NA	Unknown	Oligodendroglioma	3	39
HF0835	3.73	Dead	Oligodendroglioma	2	36
HF0844	5.25	Dead	Astrocytoma	2	33
HF0850	NA	Unknown	Astrocytoma	3	0
HF0855	1.13	Dead	Astrocytoma	2	57
HF0891	2.37	Dead	Glioblastoma	4	48
HF0894	1.16	Dead	Glioblastoma	4	55
HF0897	NA	Unknown	Oligodendroglioma	2	31
HF0899	5.48	Dead	Astrocytoma	2	55
HF0914	8.66	Alive	Astrocytoma	2	40
HF0920	0.1	Dead	Oligodendroglioma	2	66
HF0931	6.37	Alive	Astrocytoma	2	38
HF0936	0.42	Dead	Astrocytoma	2	57
HF0953-2	3.66	Dead	Astrocytoma	2	38
HF0954-2	0.9	Dead	Astrocytoma	3	74
HF0960	5.89	Dead	Oligodendroglioma	2	32
HF0962	0.66	Alive	Oligodendroglioma	2	32
HF0963	0.87	Dead	Glioblastoma	4	75
HF0966	7.95	Alive	Astrocytoma	3	53
HF0975	3	Dead	Astrocytoma	3	60
HF0982	1.1	Dead	Astrocytoma	2	66
HF0986	5.13	Dead	Glioblastoma	4	37
HF0990	6.04	Dead	Glioblastoma	4	42
HF0992	1.64	Dead	Glioblastoma	4	77
HF0996	5.9	Alive	Glioblastoma	4	52
HF1000	3.31	Dead	Astrocytoma	2	32
HF1057	2.01	Dead	Oligodendroglioma	3	62
HF1077	6.03	Dead	Glioblastoma	4	44
HF1078	1.87	Dead	Glioblastoma	4	48
HF1090	0.7	Dead	Oligodendroglioma	3	62
HF1097	0.74	Dead	Glioblastoma	4	52
HF1122	0.46	Dead	Glioblastoma	4	35
HF1136	3.73	Dead	Astrocytoma	3	36
HF1137	1.5	Dead	Glioblastoma	4	70
HF1139	1.3	Dead	Glioblastoma	4	42
HF1150	1.74	Dead	Astrocytoma	3	70
HF1156	4.61	Alive	Astrocytoma	2	33
HF1167	1.47	Dead	Oligodendroglioma	2	45
HF1178	1.3	Dead	Glioblastoma	4	72
HF1185	4.47	Alive	Astrocytoma	3	25
HF1186	1.65	Dead	Astrocytoma	3	31
HF1191	0.02	Dead	Glioblastoma	4	73
HF1220	0.86	Dead	Glioblastoma	4	63
HF1227	16.43	Alive	Oligodendroglioma	2	27
HF1232	1.66	Dead	Astrocytoma	3	51
HF1235	4.07	Alive	Astrocytoma	2	37
HF1242	12.24	Dead	Astrocytoma	3	35
HF1246	0.02	Dead	Astrocytoma	2	65
HF1255	NA	Dead	Astrocytoma	3	47
HF1262	1.95	Dead	Glioblastoma	4	59
HF1269	1.07	Dead	Glioblastoma	4	49
HF1280	1.3	Dead	Astrocytoma	3	42
HF1286	1.08	Dead	Astrocytoma	3	77
HF1292	3.57	Dead	Glioblastoma	4	47
HF1295	1.62	Dead	Astrocytoma	3	58
HF1297	NA	Dead	Glioblastoma	4	60
HF1316	0.55	Dead	Astrocytoma	2	74
HF1318	0.63	Dead	Glioblastoma	4	50
HF1319	NA	Unknown	Astrocytoma	2	37
HF1325	3.35	Alive	Astrocytoma	2	36
HF1334	6.4	Dead	Astrocytoma	2	24
HF1338	0.49	Dead	Glioblastoma	4	52
HF1344	0.74	Dead	Astrocytoma	2	60
HF1345	NA	Alive	Astrocytoma	2	19
HF1356	1.11	Dead	Glioblastoma	4	59
HF1357	2.53	Dead	Oligodendroglioma	3	23
HF1366	NA	Unknown	Astrocytoma	2	18
HF1380	NA	Unknown	Astrocytoma	2	35
HF1381	NA	Alive	Astrocytoma	2	27
HF1382	7.22	Dead	Glioblastoma	4	64
HF1397	2.47	Dead	Glioblastoma	4	64
HF1407	0.42	Dead	Astrocytoma	2	58
HF1409	1.04	Dead	Astrocytoma	3	52
HF1442	2.84	Dead	Astrocytoma	2	36
HF1458	0.73	Dead	Oligodendroglioma	3	47
HF1469	1.82	Dead	Glioblastoma	4	47
HF1475	2.61	Dead	Astrocytoma	3	19
HF1487	0.82	Dead	Oligodendroglioma	2	62
HF1489	NA	Dead	Astrocytoma	2	53
HF1490	0.33	Dead	Astrocytoma	3	68
HF1493	3.44	Dead	Oligodendroglioma	3	72
HF1494	2.75	Dead	Astrocytoma	3	31
HF1509	0.22	Dead	Glioblastoma	4	59
HF1511	2.3	Dead	Astrocytoma	2	28
HF1517	0.68	Dead	Glioblastoma	4	58
HF1534	0.64	Dead	Glioblastoma	4	55
HF1538	0.27	Dead	Glioblastoma	4	72
HF1540	0.84	Dead	Glioblastoma	4	76
HF1551	NA	Alive	Astrocytoma	2	31
HF1568	1.94	Dead	Astrocytoma	2	30
HF1581	0.02	Dead	Astrocytoma	3	66
HF1585	1.64	Dead	Glioblastoma	4	60
HF1587	1.92	Alive	Astrocytoma	3	30
HF1588	1.74	Alive	Astrocytoma	2	42
HF1589	0.27	Dead	Glioblastoma	4	69
HF1606	1.87	Alive	Astrocytoma	2	61
HF1608	0.65	Dead	Glioblastoma	4	54
HF1613	1.48	Dead	Astrocytoma	3	35
HF1618	0.19	Dead	Glioblastoma	4	54
HF1628	1.2	Dead	Glioblastoma	4	48
HF1671	0.93	Dead	Glioblastoma	4	66
HF1677	5.23	Alive	Astrocytoma	2	51
HF1702	0.44	Dead	Oligodendroglioma	3	78
HF1708	3.66	Alive	Astrocytoma	2	0

## Sheet: Li Test dataset
Sample	Survival (years)	Censor	Diagnosis	Grade	Age at diagnosis
E07733	NA	NA	NA	NA	50-54
E08021	NA	NA	Oligodendroglioma	3	30-34
E09137	NA	NA	Glioblastoma	4	50-54
E09138	NA	NA	Glioblastoma	4	50-54
E09167	NA	NA	NA	NA	65-69
E09192	NA	NA	Glioblastoma	4	35-39
E09212	NA	NA	Astrocytoma	NA	40-44
E09214	NA	NA	Glioblastoma	4	50-54
E09231	NA	NA	Astrocytoma	NA	55-59
E09233	NA	NA	Glioblastoma	4	50-54
E09238	NA	NA	NA	NA	45-49
E09239	NA	NA	Astrocytoma	3	25-29
E09262	NA	NA	Oligoastrocytoma	NA	35-39
E09263	NA	NA	NA	NA	30-34
E09264	NA	NA	NA	NA	50-54
E09278	NA	NA	Glioblastoma	4	30-34
E09289	NA	NA	Oligoastrocytoma	NA	30-34
E09296	NA	NA	Astrocytoma	2	45-49
E09331	NA	NA	Glioblastoma	4	35-39
E09334	NA	NA	Oligoastrocytoma	3	40-44
E09358	NA	NA	Oligoastrocytoma	2	50-54
E09369	NA	NA	Glioblastoma	4	55-59
E09378	NA	NA	NA	NA	45-49
E09393	NA	NA	Astrocytoma	3	30-34
E09394	NA	NA	Oligoastrocytoma	3	35-39
E09398	NA	NA	Astrocytoma	2	25-29
E09405	NA	NA	Glioblastoma	4	40-44
E09408	NA	NA	Astrocytoma	3	30-34
E09419	NA	NA	Oligodendroglioma	3	45-49
E09440	NA	NA	Oligoastrocytoma	2	30-34
E09448	NA	NA	Oligodendroglioma	3	40-44
E09449	NA	NA	Glioblastoma	4	50-54
E09451	NA	NA	Glioblastoma	4	65-69
E09471	NA	NA	Astrocytoma	2	70-74
E09478	NA	NA	Glioblastoma	4	60-64
E09483	NA	NA	Glioblastoma	4	45-49
E09489	NA	NA	Glioblastoma	4	55-59
E09494	NA	NA	NA	NA	20-24
E09503	NA	NA	Oligodendroglioma	2	45-49
E09511	NA	NA	Oligoastrocytoma	3	45-49
E09531	NA	NA	Astrocytoma	NA	55-59
E09535	NA	NA	Glioblastoma	4	40-44
E09542	NA	NA	Astrocytoma	2	35-39
E09546	NA	NA	NA	NA	60-64
E09569	NA	NA	Glioblastoma	4	45-49
E09595	NA	NA	NA	NA	50-54
E09601	NA	NA	Glioblastoma	4	40-44
E09602	NA	NA	Glioblastoma	4	65-69
E09605	NA	NA	Glioblastoma	4	60-64
E09606	NA	NA	Glioblastoma	4	50-54
E09610	NA	NA	Glioblastoma	4	55-59
E09611-B	NA	NA	NA	NA	60-64
E09615	NA	NA	Glioblastoma	4	45-49
E09622	NA	NA	Glioblastoma	4	65-69
E09624	NA	NA	Glioblastoma	4	35-39
E09629	NA	NA	NA	NA	40-44
E09647	NA	NA	Glioblastoma	4	70-74
E09649	NA	NA	Glioblastoma	4	45-49
E09654	NA	NA	Glioblastoma	4	65-69
E09655	NA	NA	Glioblastoma	4	50-54
E09656	NA	NA	Oligodendroglioma	3	40-44
E09657	NA	NA	NA	NA	50-54
E09661	NA	NA	Oligodendroglioma	2	35-39
E09664	NA	NA	Oligodendroglioma	NA	40-44
E09673	NA	NA	Astrocytoma	2	45-49
E09680	NA	NA	Glioblastoma	4	65-69
E09681	NA	NA	Oligodendroglioma	3	35-39
E09690	NA	NA	Glioblastoma	4	40-44
E09698	NA	NA	Glioblastoma	4	75-79
E09699	NA	NA	Oligodendroglioma	2	25-29
E09704	NA	NA	NA	NA	50-54
E09722	NA	NA	Glioblastoma	4	35-39
E09730	NA	NA	Glioblastoma	4	40-44
E09740	NA	NA	Glioblastoma	4	35-39
E09742	NA	NA	Glioblastoma	4	45-49
E09743	NA	NA	Astrocytoma	3	40-44
E09744	NA	NA	Glioblastoma	4	55-59
E09752	NA	NA	Glioblastoma	4	55-59
E09755	NA	NA	Oligodendroglioma	2	35-39
E09756	NA	NA	Glioblastoma	4	70-74
E09759	NA	NA	Glioblastoma	4	45-49
E09774	NA	NA	NA	NA	50-54
E09782	NA	NA	Glioblastoma	4	50-54
E09786	NA	NA	Glioblastoma	4	45-49
E09787	NA	NA	Glioblastoma	4	35-39
E09791	NA	NA	Glioblastoma	4	55-59
E09797	NA	NA	Astrocytoma	2	35-39
E09800	NA	NA	Glioblastoma	4	65-69
E09801	NA	NA	Astrocytoma	3	30-34
E09802	NA	NA	Glioblastoma	4	60-64
E09804	NA	NA	Oligodendroglioma	2	30-34
E09810	NA	NA	Glioblastoma	4	55-59
E09811	NA	NA	Astrocytoma	2	50-54
E09825	NA	NA	Glioblastoma	4	80-84
E09826	NA	NA	Astrocytoma	3	40-44
E09829	NA	NA	Glioblastoma	4	55-59
E09832	NA	NA	Glioblastoma	4	65-69
E09833	NA	NA	Glioblastoma	4	50-54
E09842	NA	NA	Glioblastoma	4	65-69
E09847	NA	NA	Glioblastoma	4	65-69
E09855	NA	NA	Astrocytoma	3	25-29
E09857	NA	NA	Glioblastoma	4	65-69
E09860	NA	NA	Oligodendroglioma	2	35-39
E09862	NA	NA	Glioblastoma	4	80-84
E09867	NA	NA	Oligodendroglioma	2	55-59
E09868	NA	NA	NA	NA	50-54
E09885	NA	NA	NA	NA	50-54
E09888	NA	NA	NA	NA	75-79
E09894	NA	NA	NA	NA	50-54
E09899	NA	NA	NA	NA	20-24
E09900	NA	NA	NA	NA	50-54
E09906	NA	NA	Glioblastoma	4	55-59
E09907	NA	NA	Glioblastoma	4	35-39
E09910	NA	NA	NA	NA	50-54
E09914	NA	NA	Astrocytoma	3	35-39
E09916	NA	NA	NA	NA	70-74
E09922	NA	NA	NA	NA	40-44
E09923	NA	NA	NA	NA	45-49
E09924	NA	NA	NA	NA	40-44
E09928	NA	NA	NA	NA	30-34
E09935	NA	NA	NA	NA	40-44
E09937	NA	NA	Oligodendroglioma	2	50-54
E09938	NA	NA	Glioblastoma	4	45-49
E09945	NA	NA	NA	NA	25-29
E09948	NA	NA	Astrocytoma	3	35-39
E09949	NA	NA	Oligodendroglioma	2	35-39
E09955	NA	NA	NA	NA	40-44
E09958	NA	NA	NA	NA	40-44
E09959	NA	NA	Astrocytoma	3	50-54
E09963	NA	NA	NA	NA	75-79
E09964	NA	NA	NA	NA	50-54
E09965	NA	NA	NA	NA	40-44
E09966	NA	NA	Astrocytoma	3	55-59
E09967	NA	NA	Glioblastoma	4	50-54
E09971	NA	NA	NA	NA	40-44
E09975	NA	NA	NA	NA	30-34
E09978	NA	NA	NA	NA	30-34
E09985	NA	NA	NA	NA	60-64
E09988	NA	NA	Oligodendroglioma	3	20-24
E09989	NA	NA	NA	NA	55-59
E09990	NA	NA	NA	NA	75-79
E09993	NA	NA	NA	NA	40-44
E09996	NA	NA	NA	NA	25-29
E09998	NA	NA	NA	NA	60-64
E10001	NA	NA	Oligodendroglioma	3	25-29
E10002	NA	NA	Glioblastoma	4	55-59
E10003	NA	NA	NA	NA	60-64
E10008	NA	NA	NA	NA	40-44
E10011	NA	NA	Oligodendroglioma	2	30-34
E10012	NA	NA	Glioblastoma	4	70-74
E10019	NA	NA	NA	NA	55-59
E10021	NA	NA	Oligodendroglioma	2	40-44
E10022	NA	NA	NA	NA	65-69
E10023	NA	NA	NA	NA	30-34
E10024	NA	NA	NA	NA	50-54
E10025	NA	NA	Astrocytoma	2	40-44
E10027	NA	NA	NA	NA	65-69
E10030	NA	NA	NA	NA	65-69
E10031	NA	NA	Glioblastoma	4	45-49
E10036	NA	NA	NA	NA	55-59
E10037	NA	NA	NA	NA	60-64
E10038	NA	NA	NA	NA	50-54
E10044	NA	NA	NA	NA	50-54
E10054	NA	NA	Oligodendroglioma	2	55-59
E10058	NA	NA	NA	NA	70-74
E10059	NA	NA	NA	NA	50-54
E10062	NA	NA	Astrocytoma	3	70-74
E10067	NA	NA	NA	NA	70-74
T508984	NA	NA	Oligodendroglioma	3	30-34
T545226	NA	NA	Glioblastoma	4	40-44
T547038	NA	NA	Astrocytoma	3	20-24
T548092	NA	NA	Astrocytoma	NA	20-24
T548457	NA	NA	Astrocytoma	3	25-29
T549279	NA	NA	Oligodendroglioma	3	40-44
T550239	NA	NA	Astrocytoma	3	60-64
T550715	NA	NA	Astrocytoma	3	30-34
T552910	NA	NA	NA	3	40-44
T554082	NA	NA	Astrocytoma	3	50-54
T570013	NA	NA	Astrocytoma	3	45-49
T602958	NA	NA	Glioblastoma	4	60-64
T607103	NA	NA	Glioblastoma	4	55-59
T607216	NA	NA	Glioblastoma	4	70-74
T608660	NA	NA	Glioblastoma	4	70-74

## Sheet: Phillips dataset
Sample	Survival (weeks)	Censor	Diagnosis	Grade	Age at diagnosis
GSM96950	131	Dead	Glioblastoma	4	60
GSM96951	236	Dead	Glioblastoma	4	48
GSM96952	313	Dead	Glioblastoma	4	43
GSM96953	210	Dead	Glioblastoma	4	38
GSM96954	70	Dead	Glioblastoma	4	45
GSM96955	34	Dead	Glioblastoma	4	49
GSM96956	NA	NA	Glioblastoma	4	NA
GSM96957	NA	NA	Glioblastoma	4	NA
GSM96958	181	Dead	Glioblastoma	4	57
GSM96959	238	Dead	Glioblastoma	4	55
GSM96960	NA	NA	Glioblastoma	4	NA
GSM96961	311	Dead	Glioblastoma	4	50
GSM96962	62	Dead	Glioblastoma	4	54
GSM96963	203	Dead	Glioblastoma	4	34
GSM96964	59	Dead	Glioblastoma	4	49
GSM96965	97	Dead	Glioblastoma	4	48
GSM96966	33	Dead	Glioblastoma	4	44
GSM96967	32	Dead	Glioblastoma	4	59
GSM96968	NA	NA	Glioblastoma	4	NA
GSM96969	55	Dead	Glioblastoma	4	82
GSM96970	59	Dead	Glioblastoma	4	41
GSM96971	NA	NA	Glioblastoma	4	NA
GSM96972	210	Alive	Glioblastoma	4	43
GSM96973	52	Dead	Glioblastoma	4	76
GSM96974	123	Dead	Glioblastoma	4	29
GSM96975	NA	NA	Glioblastoma	4	NA
GSM96976	97	Dead	Glioblastoma	4	54
GSM96977	95	Dead	Glioblastoma	4	40
GSM96978	242	Alive	Glioblastoma	4	57
GSM96979	32	Dead	Glioblastoma	4	51
GSM96980	131	Dead	Glioblastoma	4	68
GSM96981	77	Dead	Glioblastoma	4	47
GSM96982	56	Dead	Glioblastoma	4	48
GSM96983	32	Dead	Glioblastoma	4	54
GSM96984	16	Dead	Glioblastoma	4	34
GSM96985	111	Dead	Glioblastoma	4	48
GSM96986	NA	NA	Glioblastoma	4	NA
GSM96987	33	Dead	Glioblastoma	4	34
GSM96988	57	Dead	Glioblastoma	4	55
GSM96989	106	Dead	Glioblastoma	4	49
GSM96990	62	Dead	Glioblastoma	4	53
GSM96991	150	Dead	Glioblastoma	4	36
GSM96992	154	Alive	Glioblastoma	4	48
GSM96993	125	Dead	Glioblastoma	4	54
GSM96994	39	Dead	Glioblastoma	4	32
GSM96995	79	Dead	Glioblastoma	4	58
GSM96996	12	Dead	Glioblastoma	4	43
GSM96997	51	Dead	Glioblastoma	4	32
GSM96998	NA	NA	Glioblastoma	4	NA
GSM96999	NA	NA	Glioblastoma	4	NA
GSM97000	62	Dead	Glioblastoma	4	57
GSM97001	NA	NA	Glioblastoma	4	NA
GSM97002	91	Dead	Glioblastoma	4	68
GSM97003	NA	NA	Glioblastoma	4	NA
GSM97004	65	Dead	Glioblastoma	4	72
GSM97005	NA	NA	Glioblastoma	4	NA
GSM97006	NA	NA	Glioblastoma	4	NA
GSM97007	41	Dead	Glioblastoma	4	30
GSM97008	53	Dead	Glioblastoma	4	39
GSM97009	57	Dead	Glioblastoma	4	72
GSM97010	70	Dead	Glioblastoma	4	57
GSM97011	3	Dead	Glioblastoma	4	50
GSM97012	325	Alive	Astrocytoma	3	37
GSM97013	NA	NA	Astrocytoma	3	NA
GSM97014	277	Alive	Glioblastoma	4	22
GSM97015	467	Alive	Astrocytoma	3	39
GSM97016	477	Alive	Astrocytoma	3	39
GSM97017	300	Alive	Astrocytoma	3	25
GSM97018	145	Alive	Glioblastoma	4	24
GSM97019	316	Alive	Astrocytoma	3	55
GSM97020	175	Alive	Astrocytoma	3	25
GSM97021	NA	NA	Glioblastoma	4	NA
GSM97022	357	Alive	Astrocytoma	3	35
GSM97023	47	Dead	Astrocytoma	3	43
GSM97024	NA	NA	Glioblastoma	4	NA
GSM97025	81	Dead	Astrocytoma	3	36
GSM97026	174	Dead	Astrocytoma	3	44
GSM97027	102	Dead	Astrocytoma	3	35
GSM97028	NA	NA	Glioblastoma	4	NA
GSM97029	NA	NA	Astrocytoma	3	NA
GSM97030	86	Dead	Astrocytoma	3	30
GSM97031	NA	NA	Glioblastoma	4	NA
GSM97032	NA	NA	Glioblastoma	4	NA
GSM97033	115	Dead	Astrocytoma	3	23
GSM97034	108	Dead	Astrocytoma	3	34
GSM97035	244	Dead	Astrocytoma	3	32
GSM97036	460	Dead	Astrocytoma	3	53
GSM97037	73	Dead	Glioblastoma	4	49
GSM97038	46	Dead	Astrocytoma	3	45
GSM97039	445	Alive	Astrocytoma	3	31
GSM97040	53	Dead	Glioblastoma	4	54
GSM97041	53	Dead	Glioblastoma	4	54
GSM97042	322	Dead	Glioblastoma	4	45
GSM97043	NA	NA	Astrocytoma	3	NA
GSM97044	NA	NA	Glioblastoma	4	NA
GSM97045	41	Dead	Astrocytoma	3	35
GSM97046	383	Alive	Astrocytoma	3	29
GSM97047	17	Dead	Astrocytoma	3	60

## Sheet: Freije dataset
Sample	Survival (years)	Censor	Diagnosis	Grade	Age at diagnosis
GSM99496	6.89	Alive	Astrocytoma	3	41
GSM99502	1.21	Dead	Astrocytoma	3	34
GSM99504	5.01	Alive	Astrocytoma	3	34
GSM99506	2.35	Alive	Astrocytoma	3	31
GSM99566	4.27	Dead	Astrocytoma	3	37
GSM99574	3.05	Alive	Astrocytoma	3	51
GSM99592	2.4	Alive	Astrocytoma	3	30
GSM99594	5.82	Alive	Astrocytoma	3	33
GSM99432	0.52	Dead	Glioblastoma	4	49
GSM99434	0.27	Dead	Glioblastoma	4	18
GSM99436	0.98	Dead	Glioblastoma	4	64
GSM99438	0.5	Dead	Glioblastoma	4	58
GSM99440	2.63	Alive	Glioblastoma	4	48
GSM99442	0.89	Dead	Glioblastoma	4	56
GSM99444	1.08	Alive	Glioblastoma	4	78
GSM99446	1.61	Dead	Glioblastoma	4	44
GSM99448	2.14	Alive	Glioblastoma	4	42
GSM99450	0.23	Dead	Glioblastoma	4	27
GSM99452	1.39	Dead	Glioblastoma	4	54
GSM99454	0.15	Dead	Glioblastoma	4	76
GSM99456	0.19	Dead	Glioblastoma	4	82
GSM99462	0.15	Dead	Glioblastoma	4	39
GSM99466	0.18	Dead	Glioblastoma	4	69
GSM99470	0.61	Dead	Glioblastoma	4	54
GSM99472	0.26	Dead	Glioblastoma	4	62
GSM99476	1.13	Dead	Glioblastoma	4	54
GSM99478	0.51	Dead	Glioblastoma	4	50
GSM99480	0.78	Dead	Glioblastoma	4	82
GSM99482	0.25	Dead	Glioblastoma	4	34
GSM99484	0.76	Dead	Glioblastoma	4	45
GSM99486	0.82	Alive	Glioblastoma	4	64
GSM99490	0.8	Dead	Glioblastoma	4	49
GSM99492	0.26	Dead	Glioblastoma	4	54
GSM99494	0.42	Dead	Glioblastoma	4	56
GSM99524	0.12	Dead	Glioblastoma	4	52
GSM99530	0.61	Dead	Glioblastoma	4	42
GSM99534	0.02	Dead	Glioblastoma	4	35
GSM99536	1.56	Dead	Glioblastoma	4	29
GSM99544	0.35	Dead	Glioblastoma	4	31
GSM99546	0.31	Dead	Glioblastoma	4	75
GSM99548	1.15	Dead	Glioblastoma	4	43
GSM99550	1.15	Dead	Glioblastoma	4	42
GSM99552	2.98	Alive	Glioblastoma	4	40
GSM99554	2.82	Alive	Glioblastoma	4	41
GSM99556	1.98	Alive	Glioblastoma	4	47
GSM99558	3.01	Alive	Glioblastoma	4	39
GSM99560	2.98	Dead	Glioblastoma	4	23
GSM99562	2.8	Alive	Glioblastoma	4	23
GSM99564	1.87	Dead	Glioblastoma	4	61
GSM99572	0.51	Dead	Glioblastoma	4	66
GSM99576	0.38	Dead	Glioblastoma	4	24
GSM99578	0.65	Dead	Glioblastoma	4	60
GSM99580	3.42	Alive	Glioblastoma	4	33
GSM99582	1.07	Dead	Glioblastoma	4	75
GSM99584	0.56	Alive	Glioblastoma	4	65
GSM99586	0.83	Dead	Glioblastoma	4	63
GSM99588	2.54	Alive	Glioblastoma	4	40
GSM99590	1.08	Alive	Glioblastoma	4	70
GSM99468	1.82	Dead	Oligoastrocytoma	3	30
GSM99498	5.25	Alive	Oligoastrocytoma	3	34
GSM99500	2.33	Dead	Oligoastrocytoma	3	32
GSM99508	5.99	Alive	Oligoastrocytoma	3	31
GSM99568	4.04	Alive	Oligoastrocytoma	3	28
GSM99596	2.36	Alive	Oligoastrocytoma	3	36
GSM99600	1.21	Dead	Oligoastrocytoma	3	43
GSM99458	0.47	Dead	Oligodendroglioma	3	20
GSM99510	6.14	Alive	Oligodendroglioma	3	43
GSM99512	0.56	Dead	Oligodendroglioma	3	35
GSM99514	1.41	Dead	Oligodendroglioma	3	24
GSM99516	1.99	Dead	Oligodendroglioma	3	45
GSM99520	1.87	Dead	Oligodendroglioma	3	36
GSM99522	1.92	Alive	Oligodendroglioma	3	49
GSM99570	4.85	Dead	Oligodendroglioma	3	31
GSM99598	3.03	Alive	Oligodendroglioma	3	37
