# Supplementary material for: Coexpression Network Analysis Identifies Transcriptional Modules Related to Proastrocytic Differentiation and Sprouty Signaling in Glioma
Source: Oxford University Press journal article supplement (doi:10.1158/0008-5472.can-10-2465), 2010-12-14
Supplement: 00085472can102465-sup-stab_5.xls [file 00085472can102465-sup-stab_5.xls]

## Sheet: Centroids
GeneID	MarkerType	Mes	Prolif	Proastro	Proneural	Other
1192	Mes	0.991	-0.08	-1.026	-1.009	-0.322
3956	Mes	0.975	0.119	-1.03	-1.065	-0.379
831	Mes	1.013	-0.415	-0.8	-1.062	-0.243
7076	Mes	1.008	-0.121	-1.01	-0.938	-0.365
302	Mes	1.001	-0.218	-1.026	-1.093	-0.221
8826	Mes	0.981	-0.173	-0.829	-1.181	-0.26
2014	Mes	0.964	-0.159	-0.894	-0.95	-0.33
64778	Mes	0.97	-0.011	-0.948	-0.937	-0.4
967	Mes	0.886	0.12	-1.16	-1.184	-0.15
30008	Mes	0.964	-0.314	-0.868	-0.978	-0.246
9168	Mes	0.882	0.305	-1.069	-1.279	-0.234
6672	Mes	0.926	-0.367	-0.824	-0.989	-0.181
55013	Mes	0.889	0.159	-1	-1.127	-0.27
3077	Mes	0.898	-0.269	-0.771	-0.932	-0.247
6282	Mes	0.886	-0.289	-0.782	-1.009	-0.178
3958	Mes	0.98	-0.252	-0.814	-0.969	-0.326
965	Mes	0.837	0.041	-0.847	-1.146	-0.195
3074	Mes	0.923	-0.163	-1.012	-0.942	-0.229
861	Mes	0.872	0.008	-0.823	-1.089	-0.261
11079	Mes	0.806	0.147	-0.868	-1.25	-0.151
10791	Mes	0.811	-0.45	-0.735	-0.91	-0.064
5355	Mes	0.845	-0.042	-0.802	-0.847	-0.326
7132	Mes	0.83	-0.279	-0.877	-1.163	0.003
23351	Mes	0.825	-0.217	-0.745	-1.222	-0.049
9902	Mes	0.879	0.005	-0.769	-0.97	-0.348
51514	Prolif	-0.12	1.572	-0.724	0.032	-0.385
701	Prolif	-0.08	1.651	-0.779	-0.183	-0.351
7153	Prolif	-0.164	1.723	-0.723	-0.141	-0.324
9928	Prolif	-0.105	1.78	-0.779	-0.292	-0.334
7272	Prolif	-0.111	1.649	-0.693	-0.225	-0.325
9055	Prolif	-0.099	1.621	-0.729	-0.057	-0.393
22974	Prolif	-0.068	1.647	-0.826	-0.056	-0.407
1894	Prolif	-0.053	1.538	-0.737	-0.375	-0.25
51203	Prolif	0.011	1.398	-0.719	-0.127	-0.388
11130	Prolif	-0.103	1.455	-0.676	-0.017	-0.341
1063	Prolif	-0.149	1.717	-0.626	-0.327	-0.291
10615	Prolif	-0.122	1.784	-0.793	-0.113	-0.394
9493	Prolif	0.065	1.5	-0.786	-0.381	-0.36
4751	Prolif	-0.04	1.486	-0.663	-0.266	-0.324
9787	Prolif	0.077	1.545	-0.771	-0.47	-0.363
24137	Prolif	0.013	1.707	-0.934	-0.311	-0.374
9133	Prolif	-0.089	1.743	-0.724	-0.341	-0.335
64151	Prolif	-0.01	1.717	-0.868	-0.339	-0.363
890	Prolif	-0.012	1.556	-0.849	-0.323	-0.292
11004	Prolif	0.042	1.55	-0.721	-0.563	-0.296
332	Prolif	-0.028	1.603	-0.892	-0.067	-0.402
11065	Prolif	-0.058	1.649	-0.691	-0.306	-0.355
699	Prolif	0.061	1.458	-0.885	-0.137	-0.411
3832	Prolif	-0.257	1.519	-0.594	0.298	-0.363
29127	Prolif	-0.175	1.467	-0.74	0.281	-0.372
23500	Proastro	-0.451	-0.46	1.908	-0.417	0.231
65983	Proastro	-0.375	-0.559	1.558	-0.492	0.367
10247	Proastro	-0.399	-0.35	1.943	-0.227	-0.001
64850	Proastro	-0.415	-0.395	2.035	-0.339	0.059
9413	Proastro	-0.333	-0.435	1.532	-0.529	0.276
4915	Proastro	-0.457	-0.622	1.832	-0.286	0.293
217	Proastro	-0.454	-0.735	1.837	-0.115	0.262
120	Proastro	-0.583	-0.58	1.752	0.132	0.263
6565	Proastro	-0.243	-0.335	1.919	-0.542	-0.048
9414	Proastro	-0.424	-0.457	1.845	-0.326	0.176
10768	Proastro	-0.294	-0.448	1.532	-0.814	0.372
6563	Proastro	-0.294	-0.362	1.472	-0.417	0.159
11170	Proastro	-0.356	-0.535	1.581	-0.632	0.388
4329	Proastro	-0.412	-0.451	1.783	-0.058	0.054
2746	Proastro	-0.495	-0.486	1.993	0.053	0.038
3782	Proastro	-0.405	-0.392	1.938	-0.62	0.222
6509	Proastro	-0.369	-0.332	1.812	-0.559	0.166
114885	Proastro	-0.351	-0.56	1.524	-0.158	0.189
80303	Proastro	-0.35	-0.471	1.752	-0.473	0.198
117	Proastro	-0.461	-0.326	1.457	-0.248	0.28
108	Proastro	-0.49	-0.688	1.589	0.01	0.327
5091	Proastro	-0.48	-0.627	1.446	0.401	0.152
1501	Proastro	-0.569	-0.243	1.36	-0.313	0.448
374655	Proastro	-0.443	-0.293	1.838	-0.468	0.187
55187	Proastro	-0.309	-0.339	1.57	-0.717	0.271
6328	Proneural	-0.651	-0.176	0.088	2.01	-0.077
9026	Proneural	-0.545	-0.416	0.214	1.893	-0.084
55022	Proneural	-0.606	-0.346	0.347	1.894	-0.099
9873	Proneural	-0.69	-0.316	0.741	1.64	-0.046
55612	Proneural	-0.651	-0.333	0.828	1.633	-0.121
55118	Proneural	-0.56	-0.371	0.461	1.896	-0.193
23177	Proneural	-0.816	-0.125	0.839	1.651	-0.03
23769	Proneural	-0.609	-0.178	0.145	1.796	-0.051
90362	Proneural	-0.576	-0.217	0.498	1.721	-0.184
5911	Proneural	-0.613	-0.277	0.316	1.817	-0.075
6938	Proneural	-0.683	0.14	0.397	1.701	-0.182
10129	Proneural	-0.686	-0.539	0.83	1.576	0.059
53826	Proneural	-0.717	-0.133	0.829	1.468	-0.062
613	Proneural	-0.475	-0.459	0.492	1.794	-0.221
220965	Proneural	-0.56	-0.35	0.719	1.631	-0.183
650	Proneural	-0.545	-0.378	0.583	1.686	-0.158
10367	Proneural	-0.66	-0.347	0.563	1.499	0.073
23411	Proneural	-0.658	-0.204	0.772	1.607	-0.143
5862	Proneural	-0.569	-0.523	0.802	1.638	-0.119
4038	Proneural	-0.552	-0.273	0.406	1.708	-0.141
29106	Proneural	-0.596	-0.401	0.807	1.512	-0.089
157567	Proneural	-0.832	-0.393	0.982	1.506	0.142
429	Proneural	-0.632	0.084	0.203	1.783	-0.177
2893	Proneural	-0.593	-0.233	0.261	1.793	-0.089
4137	Proneural	-0.743	-0.248	0.802	1.59	-0.015
