# Supplementary material for: Coexpression Network Analysis Identifies Transcriptional Modules Related to Proastrocytic Differentiation and Sprouty Signaling in Glioma
Source: Oxford University Press journal article supplement (doi:10.1158/0008-5472.can-10-2465), 2010-12-14
Supplement: 00085472can102465-sup-stab_7.xls [file 00085472can102465-sup-stab_7.xls]

## Sheet: (A) Subtypes from orig. studies
		Subtypes from the original studies
		"Gravendeel" dataset: subtypes from [1]	"Li Train" dataset: subtypes from [2]	"Li Test" dataset: subtypes from [2]	"Phillips" dataset: subtypes from [3]	"Freije" dataset: subtypes from [4]
Subtypes defined in the present study	Mesenchymal	Cluster 23 (9.1E-29)	GB (5.8E-8)	T-GB (1.7E-10)	Mes (2.3E-7)	HC2B ~ Mes (1.7E-15)
	Proliferative	Cluster 22 (2.6E-7), Cluster 18 (2.4E-6)	GA (3.3E-10)	T-GA (0.036)	Prolif (3.2E-5)	HC2A ~ Prolif (2.4E-8)
	Proneural	Cluster 9 (3.4E-36)	OA (3.2E-9)	T-OA (1.0E-6)	PN (0.043)	HC1A ~ PN (0.017)
	Proastrocytic	Cluster 17 (4.0E-15), Cluster 0 (0.004)	OA (3.2E-7), OB (0.002)	T-OA (0.055)	PN (1.8E-8)	HC1A ~ PN (6.3E-5)
	Other	Cluster 16 (3.0E-5), Cluster 0 (0.005)	OB (0.089)	T-OB (8.1E-5)	PN (0.206)	HC1B (3.7E-7)
References:
1. Gravendeel LA, Kouwenhoven MC, Gevaert O et al. 2009. Cancer Res. 69, 9065-72.
2. Li A, Walling J, Ahn S et al. 2009. Cancer Res. 69, 2091-9.
3. Phillips HS, Kharbanda S, Chen R et al. 2006. Cancer Cell. 9, 157-73.
4. Freije WA, Castro-Vargas FE, Fang Z et al. 2004. Cancer Res. 64, 6503-10.

## Sheet: (B) Inferred Phillips subtypes
		Inferred Phillips subtypes
		"Gravendeel" dataset: Phillips subtypes	"Li Train" dataset: Phillips subtypes	"Li Test" dataset: Phillips subtypes	"Phillips" dataset: Phillips subtypes	"Freije" dataset: Phillips subtypes
Subtypes defined in the present study	Mesenchymal	Mes (2.1E-33)	Mes (1.5E-21)	Mes (1.1E-28)	Mes (3.1E-10)	Mes (2.3E-12)
	Proliferative	Prolif (6.1E-26)	Prolif (1.3E-20)	Prolif (5.7E-14)	Prolif (3.5E-7)	Prolif (3.7E-9)
	Proneural	PN (2.7E-16)	PN (1.3E-7)	PN (6.3E-6)	PN (0.039)	PN (0.020)
	Proastrocytic	PN (1.7E-15)	PN (1.2E-16)	PN (3.0E-16)	PN (1.0E-8)	PN (6.4E-4)
	Other	PN (0.003)	PN (0.312)	PN (0.047)	PN (0.168)	PN (1.7E-5)
